# Supplementary material for: ABWiSE v1.0: Toward and Agent-Based Approach to Simulating Wildfire Spread
Source: Copernicus journal article supplement (doi:10.5194/nhess-2021-179), 2021-07-01
Supplement: Supplementary file [file nhess-2021-179-CC1-supplement.pdf]

Figure 3 alternative color schemes:

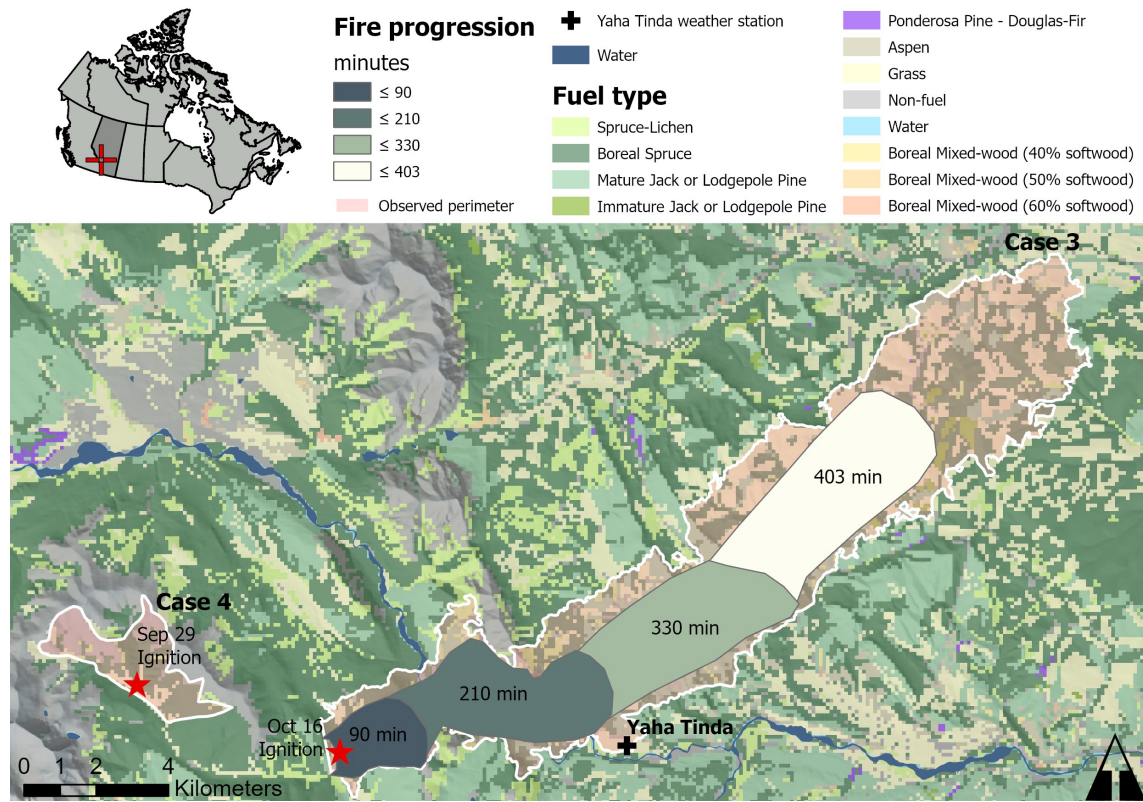

Option 1) colours based on FBP system colour scheme

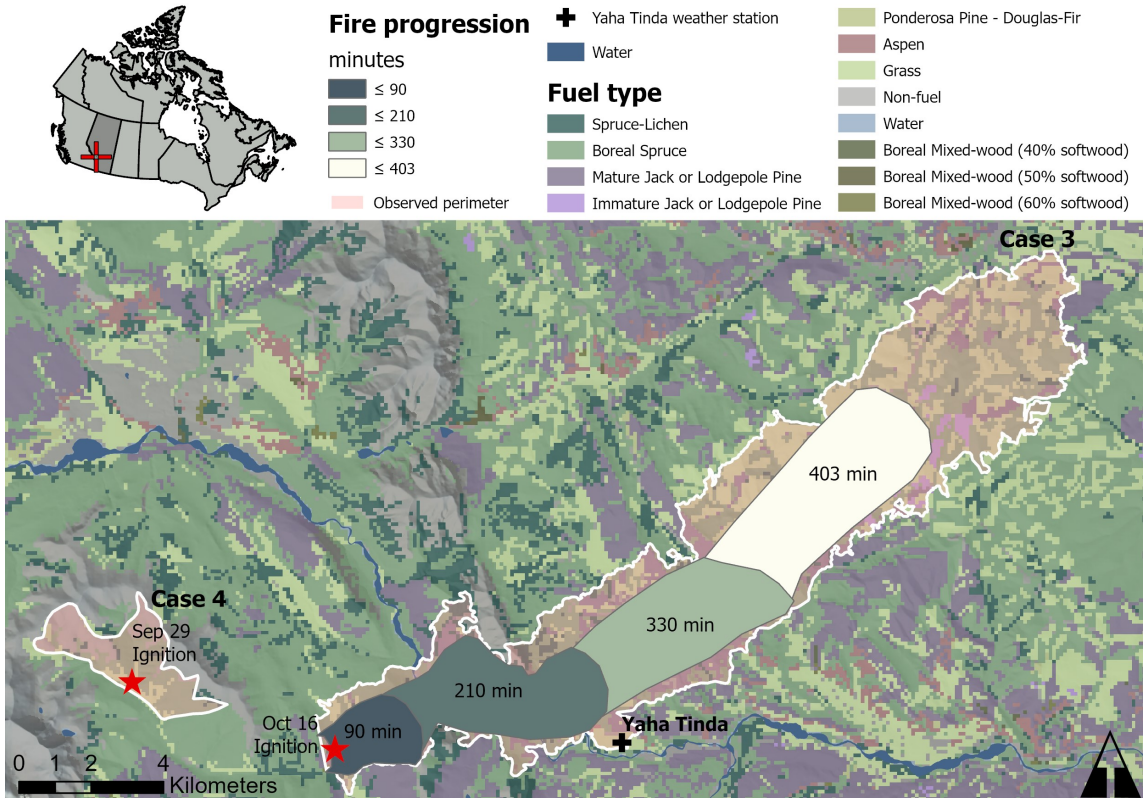

Option 2) Technically coherent colour palette.
